# Supplementary material for: Five decades of genome evolution in the globally distributed, extensively antibiotic-resistant Acinetobacter baumannii global clone 1
Source: PubMed Central journal article supplement (PMC5320584; doi:10.1099/mgen.0.000052), 2016-02-23
Supplement: mgen-02-52-s001.pdf [file mgen-02-52-s001.pdf]

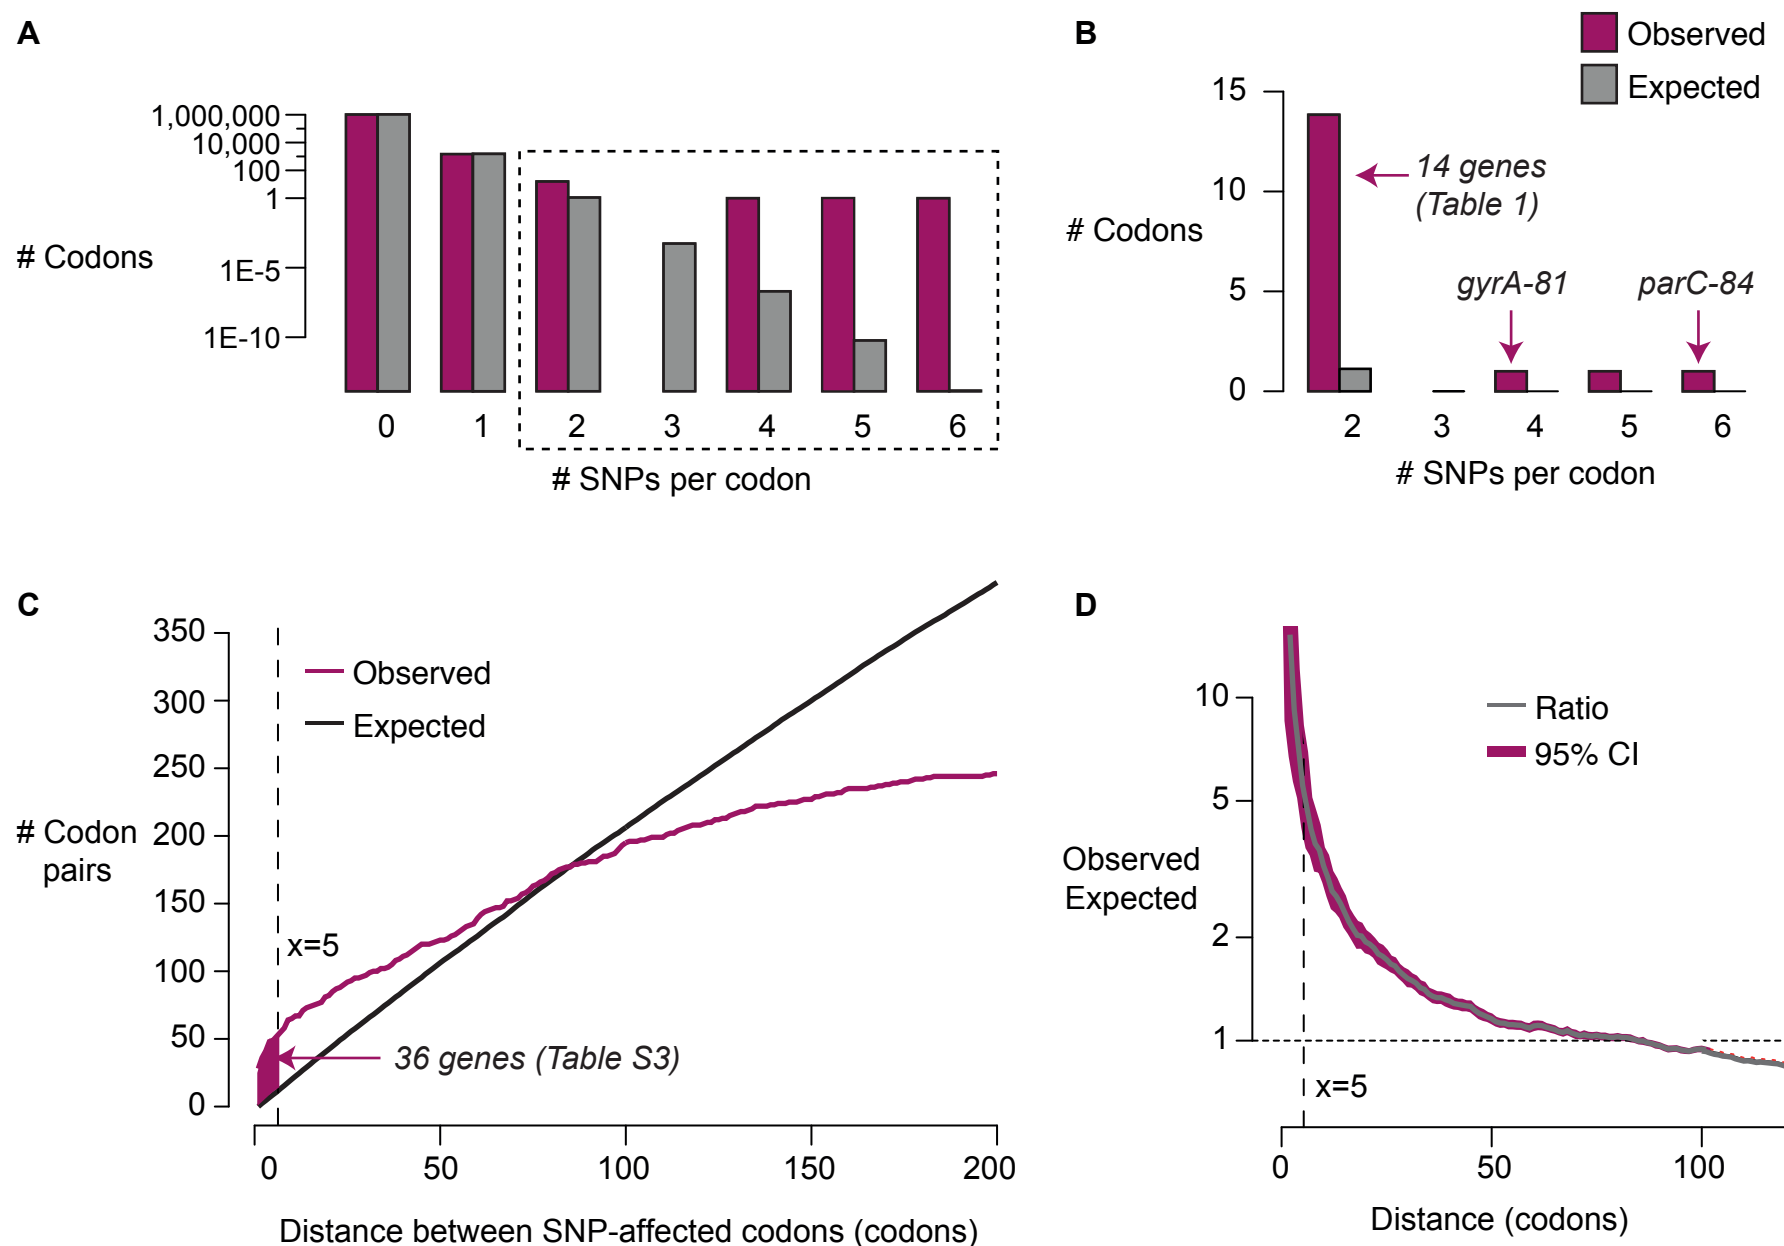

**Figure S1. Selection analysis of *A. baumannii* GC1 based on SNP variation.**

(A-B) Codon mutation frequency spectrum, shown in log scale (A) and ordinal scale for zoom-in on codons with  $\geq 2$  SNPs (B). Expected values were calculated assuming a random Poisson distribution of SNPs (see **Methods**). Affected genes are detailed in **Table 1**.

(C-D) Frequency distribution of distances between SNP-affected codons, expected values calculated assuming a random spatial distribution of SNPs in the chromosome. Shaded region in (C) indicates SNP distances that are 5-fold enriched compared to the random distribution, which happens to correspond to a distance of  $\leq 5$  codons (as shown in D). That is, there are 5 times as many SNP pairs separated by 5 or fewer codons than would be expected under a random spatial distribution of SNPs. This is taken to indicate significant clustering of SNPs over small distances; the affected genes are listed in **Table S3**.

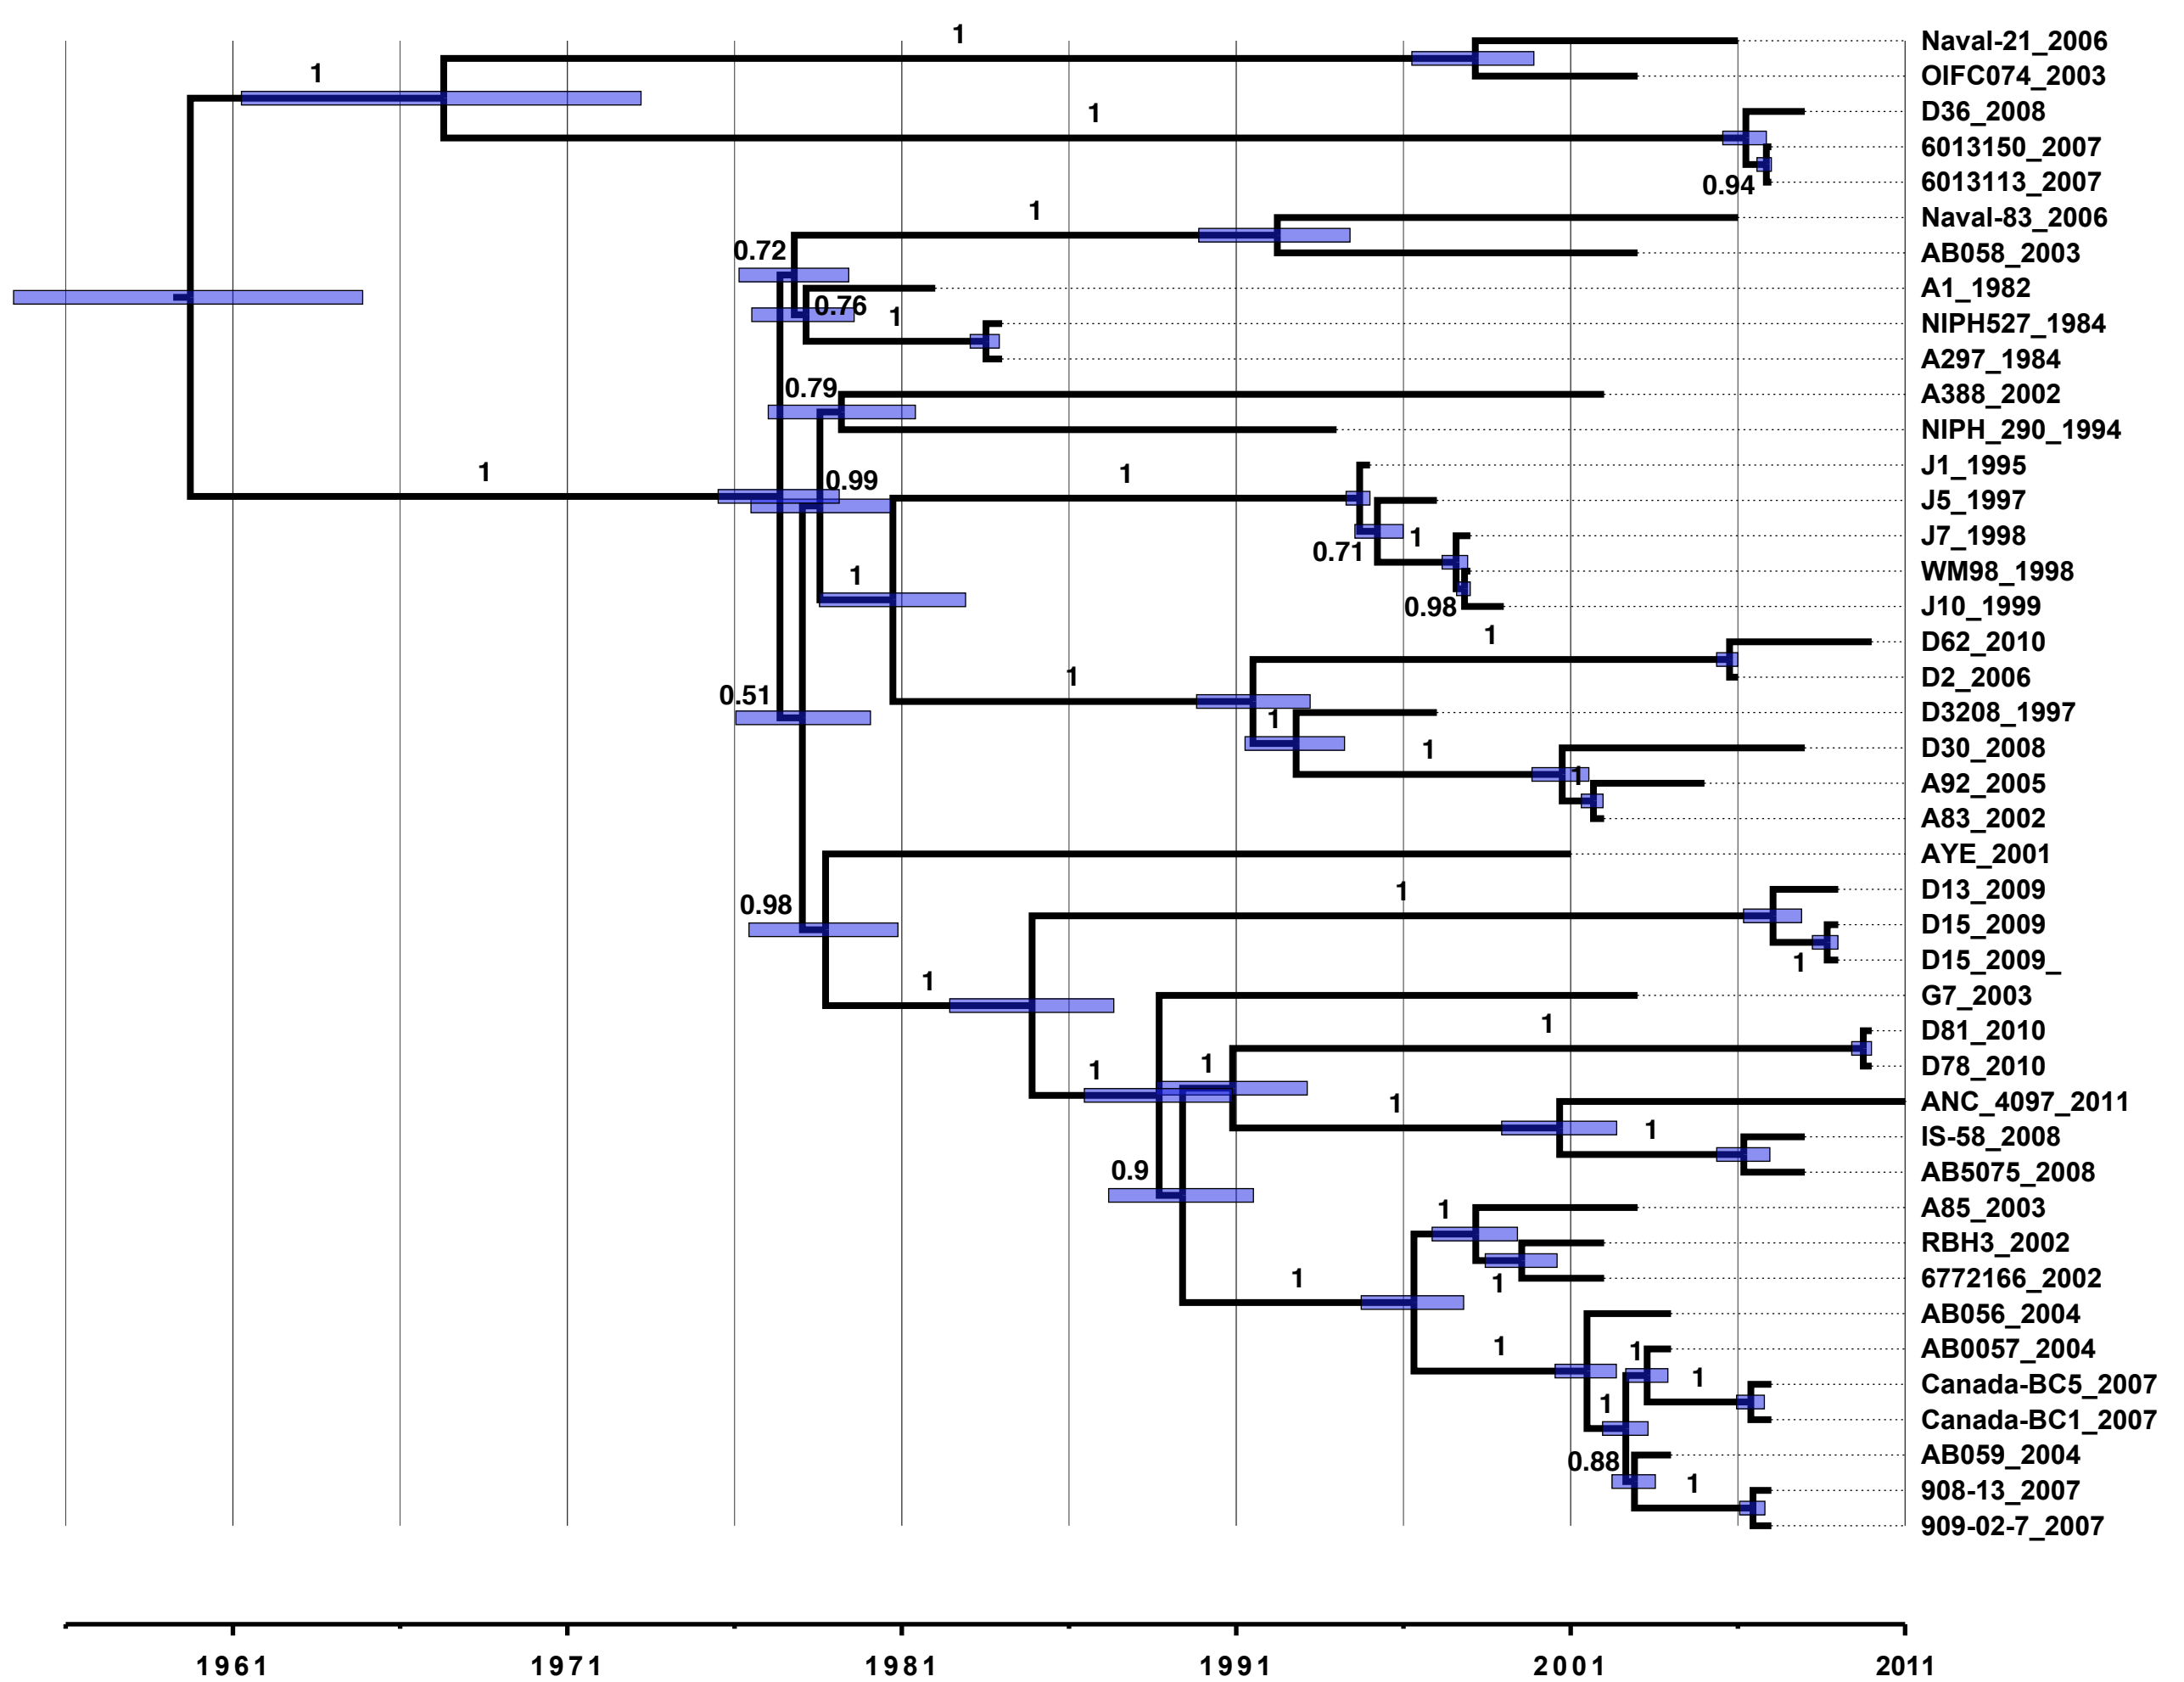

**Figure S2. Phylogeny inferred using BEAST.**

Blue bars indicate 95% HPDs for node dates. Branches are labeled with clade support.

## a Tn 6019 backbone

derived from class 1 integron

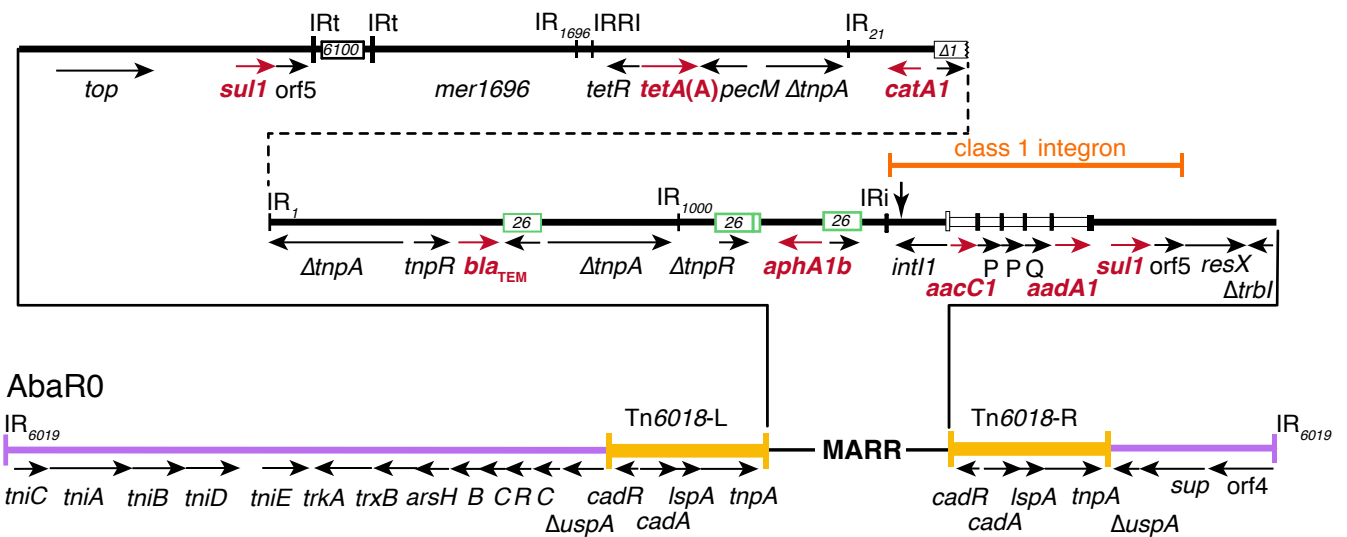

### Tn6019::Tn6018

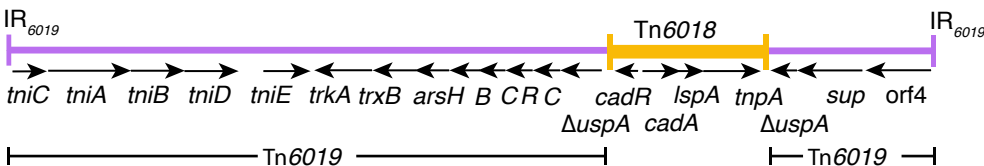

## b Tn 6022 backbone

1 kb

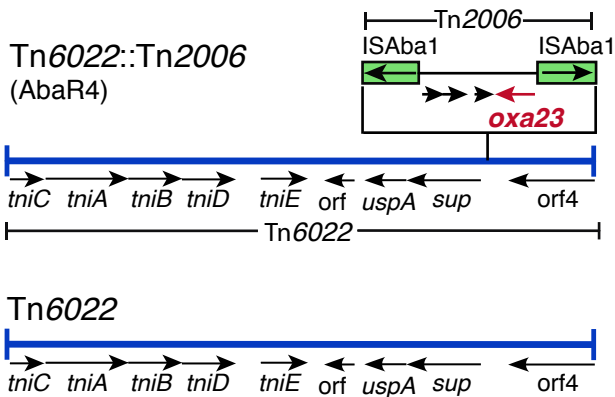

**Figure S3. Structures of transposons found in *comM*.**

**A.** Transposons with a Tn6019 backbone. Segments derived from Tn6019 are mauve and Tn6018 are ochre; inverted repeats (IR) shown as vertical lines. The structure of the Multiple Antibiotic Resistance Region (MARR) of AbaR0 is shown above. Labeled arrows below show the orientation and extent of genes and open reading frames, and antibiotic resistance genes are red. Genes conferring resistance to mercuric ions are represented by *mer1696*. Open boxes with a number inside represent IS (insertion sequences) and open boxes with vertical bar at their ends represent gene cassettes. The extents of the two class 1 integron-derived segments are shown above and a vertical arrow at the 3'-end of the *intI1* gene indicates the location of 108 bp deletion in AbaR3-type islands. Structures are drawn to scale for GenBank accession number KF483599.

**B.** Structures of Tn6022 and Tn6022::Tn2006 (AbaR4). Arrows indicate the orientation and extent of the genes and open reading frames and the antibiotic resistance gene is red. The position of Tn2006, which includes *oxa23* and two copies of *ISAbA1*, is shown above. Structures are drawn to scale for GenBank accession number JN107991. Further details of these structures can be found in PMID: 20375036, PMID: 21873287 and PMID: 24080502.

A

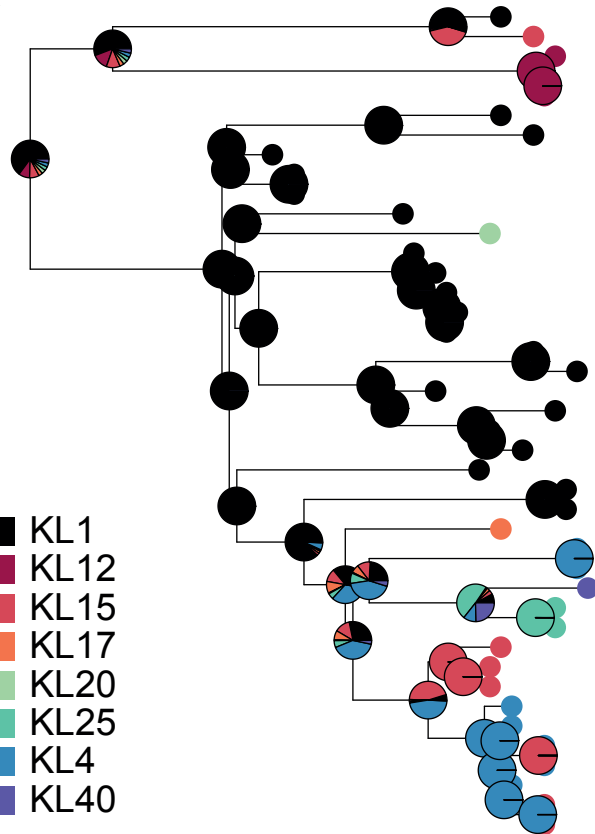

B

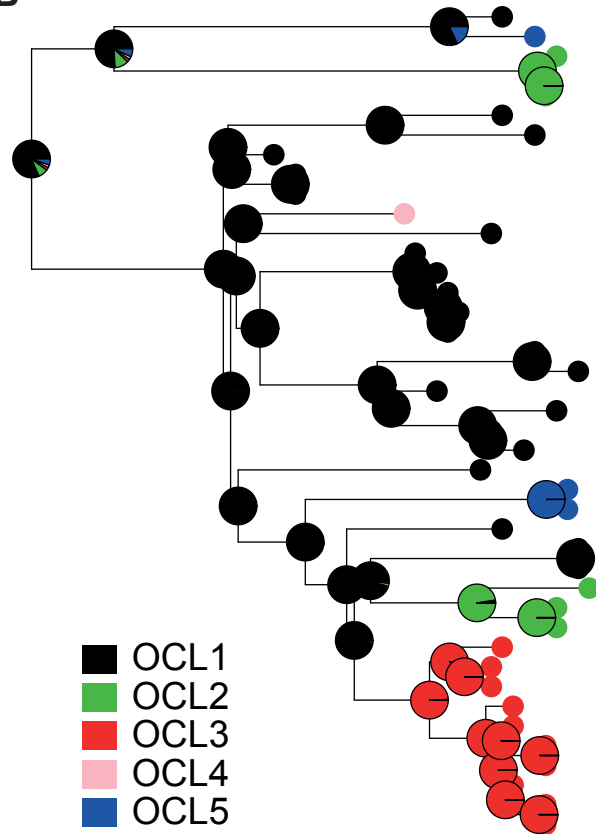

**Figure S4. Maximum likelihood ancestral trait reconstruction for K and OC types.** Pie graphs indicate the relative probability estimates of each K or OC locus occurring at each internal node in the tree.

**Supplementary Table 1. Isolates sequenced and/or phenotyped for this study (continued on next page)**

| Strain <sup>a</sup> | Location of isolation | Year of isolation | Source                | MLST (Instituit Pasteur)   |                | Capsule locus | OC locus | <i>carO</i> allele <sup>c</sup> | Antibiotic resistance profile <sup>d</sup>                            |
|---------------------|-----------------------|-------------------|-----------------------|----------------------------|----------------|---------------|----------|---------------------------------|-----------------------------------------------------------------------|
|                     |                       |                   |                       | MLST <sup>b</sup> (Oxford) |                |               |          |                                 |                                                                       |
| A1                  | UK                    | 1982              | nr <sup>e</sup>       | ST1                        | ST231 (ST109)  | KL1           | OCL1     | III                             | ApSmSpSuTcTp                                                          |
| A297 <sup>g</sup>   | Netherlands           | 1984              | nr                    | ST1                        | ST231 (ST109)  | KL1           | OCL1     | III                             | ApSmSuTcTpKmTm                                                        |
| A388                | Greece                | 2002              | nr                    | ST1                        | ST439 (ST248)  | KL20          | OCL4     | I                               | ApCTX, CAZ, TIM, IPM, MER, SmSpSuTcTpKmNmGmNeAkTm                     |
| J1                  | Sydney                | 1995              | nr                    | ST1                        | ST231          | KL1           | OCL1     | III                             | ApSmSpSuTcTpKmNmGmCIP, Nx                                             |
| D3208               | Sydney                | 1997              | Blood                 | ST1                        | ST231 (ST109)  | KL1           | OCL1     | III                             | ApSmSpSuTcTpKmNmGmCIP, Nx                                             |
| J5                  | Sydney                | 1997              | nr                    | ST1                        | ST231          | KL1           | OCL1     | III                             | ApSmSpSuTcTpKmNmGmCIP, Nx                                             |
| WM98                | Sydney                | 1998              | Wound                 | ST1                        | ST231 (ST109)  | KL1a          | OCL1     | III                             | ApSmSpSuTcTpKmNmGmCIP, Nx                                             |
| J7                  | Sydney                | 1998              | nr                    | ST1                        | ST231          | KL1a          | OCL1     | III                             | ApSmSpSuTcTpKmNmGmCIP, Nx                                             |
| J10                 | Sydney                | 1999              | nr                    | ST1                        | ST231          | KL1a          | OCL1     | III                             | ApSmSpSuTcTpKmNmGmCIP, Nx                                             |
| D2                  | Sydney                | 2006              | Wound                 | ST1                        | ST231 (ST109)  | KL1b          | OCL1     | III                             | ApSmSpSuTcTpKmNmGmCIP, Nx                                             |
| D62                 | Sydney                | 2010              | Midstream Urine       | ST1                        | ST231 (ST109)  | KL1b          | OCL1     | III                             | SpSuKmGmCIP, Nx                                                       |
| D30                 | Sydney                | 2008              | Wound                 | ST1                        | ST231 (ST109)  | KL1           | OCL1     | III                             | ApSmSpSuTcTpKmNmGmCIP, Nx                                             |
| A83                 | Sydney                | 2002              | -                     | ST1                        | ST231 (ST109)  | KL1           | OCL1     | III                             | ApSmSpSuTcTpKmNmGmCIP, Nx                                             |
| A92                 | Sydney                | 2005              | Urine                 | ST1                        | ST231 (ST109)  | KL1           | OCL1     | III                             | ApSmSpSuTcTpKmNmGmCIP, Nx                                             |
| A85                 | Sydney                | 2003              | Sputum                | ST1                        | ST231 (ST109)  | KL15          | OCL3     | III                             | ApCTX, CAZ, TIM, IPM, MER, SmSpSuTcTpKmNmGmCIP, Nx                    |
| 6772166             | Adelaide              | 2002              | Pus                   | ST1                        | ST1781 (ST126) | KL15          | OCL3     | III                             | ApCTX, CAZ, TIM, SmSpSuTcTpKmNmGmCIP, Nx                              |
| RBH3                | Brisbane              | 2002              | Endotracheal Aspirate | ST1                        | ST1781 (ST126) | KL15          | OCL3     | III                             | ApCTX, CAZ, TIM, SmSpSuTcTpKmNmGmCIP, Nx                              |
| D15                 | Sydney                | 2009              | Urine                 | ST1                        | ST231 (ST109)  | KL1           | OCL5     | IV                              | ApCTX, CAZ, SmSpSuTcTpKmNmGmCIP, Nx                                   |
| D13                 | Sydney                | 2009              | Urine                 | ST1                        | ST231 (ST109)  | KL1           | OCL5     | IV                              | ApCTX, CAZ, SmSpSuTcTpKmNmGmCIP, Nx                                   |
| G7                  | Melbourne             | 2003              | nr                    | ST1                        | ST231 (ST109)  | KL17          | OCL1     | III                             | ApCTX, CAZ, TIM, SmSpSuTcTpKmNmGmAk                                   |
| D81                 | Sydney                | 2010              | Wound                 | ST1                        | ST441 (ST347)  | KL4           | OCL1b    | III                             | ApCTX, CAZ, TIM, IPM, MER, SmSpSuTcTpKmNmGmAkCIP, Nx                  |
| D78                 | Sydney                | 2010              | nr                    | ST1                        | ST441 (ST347)  | KL4           | OCL1b    | III                             | ApCTX, CAZ, TIM, IPM, MER, SmSpSuTcTpKmNmGmAkCIP, Nx                  |
| D36                 | Sydney                | 2008              | Wound                 | ST81                       | ST498 (ST247)  | KL12          | OCL2     | III                             | ApCTX, CAZ, TIM, IMP, MER, SmSuTcTpKmNmGmTmCIP, Nx                    |
| AYE                 | France                | 2001              | Pneumonia and UTI     | ST1                        | ST231          | KL1           | OCL1     | III                             | ApCTX, CAZ, SmSpSuTcTpKmNmGmNeTmCIP, Nx <sup>i</sup>                  |
| AB0057              | USA                   | 2004              | Blood                 | ST1                        | ST207          | KL4           | OCL3     | III                             | ApCTX, CAZ, TIM, IPM, MER, SmSpSuTcTpKmNmGmCIP, Nx <sup>i</sup>       |
| AB5075              | USA                   | 2008              | Bone infection        | ST1                        | ST468          | KL25          | OCL2     | III                             | ApCTX, CAZ, TIM, IPM, MER, SmSpSuTcTpKmNmGmNeAkTmCIP, Nx <sup>i</sup> |

<sup>a</sup> We thank Kevin Townner for A1, A297 (RUH875) and A388 (10); Jon Iredell for isolates prefixed J or WM, which were reported in (22); other Australian isolates have been reported previously (5, 6, 7, 8, 9, 18, 19, 20 and 21). Complete genomes are available for AYE (GenBank accession number CU459141) (3), AB0057 (GenBank accession number CP001182) (2) and AB5075 (GenBank accession number CP008706) (4) and A1 (GenBank accession number CP010781) (11).

<sup>b</sup> The Oxford ST were determined from whole genome sequences. Oxford MLST scheme numbers in brackets indicate the ST determined by PCR and sequencing the products found in the references (5, 6, 7, 8 and 9).

<sup>c</sup> The *carO* variants have been previously classified in reference (17).

<sup>d</sup> Ap, ampicillin; CTX, cefotaxime; CAZ, ceftazidime; TIM, timentin (ticarcillin clavulanic acid); IPM, imipenem; MER, meropenem; Sm, streptomycin; Sp, spectinomycin; Su, sulphonamides; Tc, tetracycline; Tp, trimethoprim; Cl, chloramphenicol; Fl, florfenicol; Km, kanamycin; Nm, neomycin; Gm, gentamicin; Ne, netilmicin; Ak, amikacin; Tm, tobramycin; CIP, ciprofloxacin; Nx, nalidixic acid. Resistance profiles of the strains colored gray have been examined in the references (1) and (2) using a different antibiotic set.

<sup>e</sup> Not recorded.

<sup>f</sup> The annotated sequence of AbaR24 is in JN968482 and in the complete genome of A1 (GenBank accession number CP010781).

<sup>g</sup> Also known as RUH875, the GC1 reference strain.

<sup>h</sup> AbaR4 is not a close relative of other AbaR typed lists and is not derived from AbaR0. Hence, AbaR4 has been acquired independently.

<sup>i</sup> Antibiotic resistance profile determined in this study. AYE has also been reported as resistant to beta-lactams (except imipenem, piperacillin-tazobactam, and ticarcillin-clavulanate), aminoglycosides, fluoroquinolones, chloramphenicol, tetracycline, and rifampin in reference (3).

<sup>j</sup> Antibiotic resistance profile determined in this study. AB0057 has also been reported as cefepime resistant in reference (1).

<sup>k</sup> In reference (12), AB5075 is reported as resistant to ampicillin/sulbactam, aztreonam, cefepime, ceftazidime, ciprofloxacin, gentamicin, imipenem, levofloxacin, and tobramycin and sensitive to tetracycline.

<sup>l</sup> Not applicable. AB5075 only includes, Tn6019: Tn6018, the Tn6019 backbone transposon containing one copy of Tn6018 (4). Tn6019 is incorrectly annotated in (4).

<sup>m</sup> Public genome assembly only; all other assemblies were generated for this study.

## References

- Adams, M. D., E. R. Chan, N. D. Molyneaux, and R. A. Bonomo. 2010. Genome-wide analysis of divergence of antibiotic resistance determinants in closely related isolates of *Acinetobacter baumannii*. *Antimicrob Agents Chemother* 54:3569-3577. PMID: 20530228
- Adams, M. D., K. Goglin, N. Molyneaux, K. M. Hujer, H. Lavender, J. J. Jamison, I. J. MacDonald, K. M. Martin, T. Russo, A. A. Campagnari, A. M. Hujer, R. A. Bonomo, and S. R. Gill. 2008. Comparative genome sequence analysis of multidrug-resistant *Acinetobacter baumannii*. *J Bacteriol* 190:8053-8064. PMID: 18931120
- Fournier, P.-E., D. Vallet, V. Barbe, S. Audic, H. Ogata, L. Poirel, H. Richet, C. Robert, S. Mangenot, C. Abregil, P. Nordmann, J. Weissenbach, D. Raoult, and J.-M. Claverie. 2006. Comparative genomics of multidrug resistance in *Acinetobacter baumannii*. *PLoS Genet* 2:e7. PMID: 16415984
- Gallagher, L. A., E. Ramage, E. J. Weiss, M. Radey, H. S. Hayden, K. G. Held, H. K. Zurawski, M. J. Brittnacher, C. Manoel. 2015. Resources for genetic and genomic analysis of emerging pathogen *Acinetobacter baumannii*. *J Bacteriol* 197:2027-35. PMID: 25845845
- Hamidian, M., and R. M. Hall. 2011. AbaR4 replaces AbaR3 in a carbapenem-resistant *Acinetobacter baumannii* isolate belonging to global clone 1 from an Australian hospital. *J Antimicrob Chemother* 66:2484-2491. PMID: 21873287
- Hamidian, M., and R. M. Hall. 2014. Tn6168, a transposon carrying an ISAbal1-activated *ampC* gene and conferring cephalosporin resistance in *Acinetobacter baumannii*. *J Antimicrob Chemother* 69:77-80. PMID: 23920428
- Hamidian, M., K. E. Holt, D. Pickard, G. Dougan, and R. M. Hall. 2014. A GC1 *Acinetobacter baumannii* isolate carrying AbaR3 and the aminoglycoside resistance transposon TnaphA6 in a conjugative plasmid. *J Antimicrob Chemother* 69:955-958. PMID: 24235096
- Hamidian, M., J. J. Kenyon, K. E. Holt, D. Pickard, and R. M. Hall. 2014. A conjugative plasmid carrying the carbapenem resistance gene *bla<sub>OXA-23</sub>* in AbaR4 in an extensively resistant GC1 *Acinetobacter baumannii* isolate. *J Antimicrob Chemother* 69:2625-2628. PMID: 24907141
- Hamidian, M., M. Wynn, K. E. Holt, D. Pickard, G. Dougan, and R. M. Hall. 2014. Identification of a marker for two lineages within the GC1 clone of *Acinetobacter baumannii*. *J Antimicrob Chemother* 69:557-558. PMID: 24080502
- Hamouda, A., B. A. Evans, K. J. Townner, and S. G. Amyes. 2010. Characterization of epidemiologically unrelated *Acinetobacter baumannii* isolates from four continents by use of multilocus sequence typing, pulsed-field gel electrophoresis, and sequence-based typing of bla(OXA-51-like) genes. *J Clin Microbiol* 48:2476-2483. PMID: 20421437
- Holt, K. E., M. Hamidian, J. J. Kenyon, M. T. Wynn, J. Hawkey, D. Pickard, R. M. Hall. 2015. Genome Sequence of *Acinetobacter baumannii* Strain A1, an Early Example of Antibiotic-Resistant Global Clone 1. *Genome Announc* 12:3. pii: e00032-15. doi: 10.1128/genomeA.00032-15. PMID: 25767221
- Jacobs, A. C., M. G. Thompson, C. Black, J. L. Kessler, L. P. Clark, C. N. McQuary, H. Y. Gancz, B. W. Corey, J. K. Moon, Y. Si, M. T. Owen, J. D. Hallock, Y. I. Kwak, A. Summers, C. Z. Li, D. A. Rasko, W. F. Penwell, C. L. Honnold, M. C. Wise, P. E. Waterman, E. P. Lesho, R. L. Stewart, L. A. Actis, T. J. Palsy, D. W. Craft, and D. V. Zurawski. 2014. AB5075, a Highly Virulent Isolate of *Acinetobacter*. *J Bacteriol* 196:2625-2628. PMID: 24907141
- Kenyon, J. J., R. M. Hall. 2013. Variation in the complex carbohydrate biosynthesis loci of *Acinetobacter baumannii* genomes. *PLoS One* 16:8:e62160. PMID: 23614028
- Kenyon, J. J., K. E. Holt, D. Pickard, G. Dougan, and R. M. Hall. 2014. Insertions in the OCL1 locus of *Acinetobacter baumannii* lead to shortened lipooligosaccharides. *Res Microbiol* 165:472-5. PMID: 24861001
- Kenyon, J. J., A. M. Marzaioli, C. De Castro, and R. M. Hall. 2015. 5,7-di-N-acetyl-acinetamic acid: A novel non-2-ulonic acid found in the capsule of an *Acinetobacter baumannii* isolate. *Glycobiology* 25: 644-654. PMID: 25595948
- Kenyon, J. J., S. J. Nigro, and R. M. Hall. 2014. Variation in the OC locus of *Acinetobacter baumannii* genomes predicts extensive structural diversity in the lipooligosaccharide. *PLoS One* 23:9:e107833. PMID: 25247305
- Mussi, M. A., A. S. Limansky, V. Relling, P. Ravasi, A. Arakaki, L. A. Actis, and A. M. Viale. 2011. Horizontal gene transfer and assortative recombination within the *Acinetobacter baumannii* clinical population provide genetic diversity at the single *carO* gene, encoding a major outer membrane protein channel. *J Bacteriol* 193:4736-4748. PMID: 21764928
- Nigro, S. J., V. Post, and R. M. Hall. 2011. The multidrug-resistant *Acinetobacter baumannii* European clone J type strain RUH875 (A297) carries a genomic antibiotic resistance island AbaR21, plasmid pRAY and a cluster containing ISAbal1-*str2*-CR2-*strB*-*strA*. *J Antimicrob Chemother* 66:1928-1930. PMID: 21642651
- Post, V., and R. M. Hall. 2009. AbaR5, a large multiple-antibiotic resistance region found in *Acinetobacter baumannii*. *Antimicrob. Agents Chemother* 53:2667-2671. PMID: 19364869
- Post, V., M. Hamidian, and R. M. Hall. 2012. Antibiotic-resistant *Acinetobacter baumannii* variants belonging to global clone 1. *J Antimicrob Chemother* 67:1039-1040. PMID: 22279182
- Post, V., P. A. White, and R. M. Hall. 2010. Evolution of AbaR-type genomic resistance islands in multiply antibiotic-resistant *Acinetobacter baumannii*. *J Antimicrob Chemother* 65:1162-1170. PMID: 20375036
- Valenzuela, J. K., L. Thomas, S. R. Partridge, T. Reijden, L. Dijkshoorn, J. Iredell. 2007. Horizontal gene transfer in a polyclonal outbreak of carbapenem-resistant *Acinetobacter baumannii*. *J Clin Microbiol* 45:453-60. PMID: 17108068

Supplementary Table 1. Isolates sequenced and/or phenotyped for this study (continued from previous page)

| Strain <sup>a</sup>               | AbaR type | AbaR accession number | AbaR Reference | KL and OCL accession number | KL and OCL reference | Accession number (reads) | No. reads | Mean read depth (x) | Accession number (assembly) | Assembly size (bp) | No. contigs | N50 (bp)                 |
|-----------------------------------|-----------|-----------------------|----------------|-----------------------------|----------------------|--------------------------|-----------|---------------------|-----------------------------|--------------------|-------------|--------------------------|
| A1                                | 24        | IN966482 <sup>r</sup> | 11             | CP010781                    | 13                   | ERR110077                | 305,288   | 63                  | CP010781                    | 3,909,008          | 1           | (Finished using PacBio)  |
| A297 <sup>s</sup>                 | 21        | KM921776              | 18             | -                           | -                    | ERR110085                | 305,288   | 98                  | FBWR01000000                | 4,113,004          | 105         | 418,925                  |
| A388                              | 28        | -                     | -              | JQ684178                    | 16 and this study    | ERR110081                | 389,280   | 75                  | FBXE01000000                | 3,925,992          | 138         | 150,382                  |
| J1                                | 0         | -                     | -              | -                           | -                    | ERR249288                | 515,971   | 95                  | FBWQ01000000                | 3,965,235          | 66          | 462,701                  |
| D3208                             | 5         | FJ172370              | 19             | FJ172370                    | -                    | ERR119671                | 824,080   | 164                 | FBWZ01000000                | 3,940,429          | 89          | 354,592                  |
| J5                                | 0         | -                     | -              | -                           | -                    | ERR249292                | 397,079   | 64                  | FBWP01000000                | 3,969,566          | 67          | 467,836                  |
| WM98                              | 0         | KF483599              | 9              | KF483599                    | this study           | ERR119657                | 1,266,600 | 247                 | FBXB01000000                | 4,069,158          | 81          | 358,980                  |
| J7                                | 0         | -                     | -              | -                           | -                    | ERR249294                | 484,631   | 84                  | FBWT01000000                | 4,071,430          | 76          | 462,414                  |
| J10                               | 0         | -                     | -              | -                           | -                    | ERR249297                | 678,612   | 115                 | FBWS01000000                | 4,080,334          | 77          | 462,517                  |
| D2                                | 6         | GQ406245              | 21             | GQ406245                    | this study           | ERR119664                | 970,762   | 190                 | FBWY01000000                | 3,956,778          | 96          | 218,350                  |
| D62                               | 6         | -                     | -              | -                           | -                    | ERR119670                | 958,712   | 192                 | FBWW01000000                | 3,798,756          | 92          | 212,067                  |
| D30                               | 26        | KC665626              | -              | -                           | -                    | ERR110067                | 438,337   | 88                  | FBXG01000000                | 3,880,575          | 65          | 354,583                  |
| A83                               | 7         | -                     | -              | -                           | -                    | ERR110098                | 377,590   | 78                  | FBWU01000000                | 3,858,636          | 53          | 358,985                  |
| A92                               | 7         | GQ406246              | 21             | -                           | -                    | ERR110100                | 535,602   | 109                 | FBWV01000000                | 3,900,058          | 57          | 358,953                  |
| A85                               | 3         | KC118540              | 6, 8           | KC118540                    | 8, 13                | ERR110086                | 305,379   | 60                  | FBXA01000000                | 4,083,615          | 124         | 292,020                  |
| 6772166                           | 3         | -                     | 6              | -                           | -                    | ERR110082                | 454,791   | 73                  | FBWX01000000                | 4,005,394          | 111         | 351,586                  |
| RBH3                              | 3         | -                     | 6              | -                           | -                    | ERR119660                | 1,062,070 | 204                 | FBXD01000000                | 4,011,404          | 132         | 303,138                  |
| D15                               | 8         | -                     | -              | -                           | -                    | ERR263719                | 4,861,924 | 110                 | FBXJ01000000                | 4,050,321          | 111         | 348,084                  |
| D13                               | 8         | HM590877              | 20             | HM590877                    | 16                   | ERR119668                | 1,221,556 | 234                 | FBXI01000000                | 4,049,172          | 112         | 267,583                  |
| G7                                | 3         | -                     | 7              | KC118541                    | this study           | ERR110102                | 379,672   | 70                  | FBXF01000000                | 4,072,474          | 109         | 309,831                  |
| D81                               | 23        | JN409449              | 7              | JN409449                    | 13, 14               | ERR119659                | 971,121   | 185                 | FBXC01000000                | 4,011,114          | 106         | 198,767                  |
| D78                               | 23        | -                     | 7              | -                           | -                    | ERR119679                | 957,401   | 185                 | FBXH01000000                | 4,010,315          | 105         | 198,760                  |
| D36 <sub>a</sub> <sup>b</sup>     | -         | JN107991              | 5              | JN107991                    | 13, 15               | ERR119658                | 1,010,380 | 185                 | CP012952                    | 4,147,982          | 1           | (Finished using PacBio)  |
| AYE                               | 1         | CT025832              | 3              | -                           | -                    | -                        | -         | -                   | CU459141*                   | 3,936,291          | 1           | (Public finished genome) |
| AB0057                            | 3         | CP001182              | 2              | -                           | -                    | SRR1997868               | 4,869,486 | 134                 | CP001182*                   | 4,050,513          | 1           | (Public finished genome) |
| AB5075 <sub>na</sub> <sup>i</sup> | -         | CP008706              | 4              | BK008886                    | this study           | -                        | -         | -                   | AHAH00000000*               | 3,984,833          | 99          | 136,399                  |

Table S2. Public genome data used in this study.

| Strain                | Location of isolation | Year of isolation | Source            | (Pasteur) <sup>a</sup> | (Oxford) <sup>a</sup> | Capsule locus    | OC locus          | <i>carO</i> allele <sup>b</sup> | AbaR type         | Accession number (assembly) | Accession number (reads) | Reference |
|-----------------------|-----------------------|-------------------|-------------------|------------------------|-----------------------|------------------|-------------------|---------------------------------|-------------------|-----------------------------|--------------------------|-----------|
| TG19582               | nr <sup>c</sup>       | nr                | nr                | ST1                    | ST231                 | KL1              | OCL1              | III                             | No AbaR           | AMIV000000000               | -                        | 5         |
| 307-0294 <sup>d</sup> | USA                   | 1994              | Blood             | ST1                    | ST231                 | KL1              | OCL1              | III                             | No AbaR           | CP001172                    | -                        | 2         |
| NIPH 527 <sup>e</sup> | Netherlands           | 1984              | Urine             | ST1                    | ST231                 | KL1              | OCL1              | III                             | [21] <sup>f</sup> | APQW000000000               | SRR654309                | 6         |
| NIPH 290              | Netherlands           | 1994              | Urine             | ST1                    | ST231                 | KL1              | OCL1              | III <sup>g</sup>                | 0                 | APRD000000000               | SRR654194                | 6         |
| OIFC074               | USA                   | 2003              | nr                | ST19                   | ST231                 | KL1              | OCL5              | II                              | Tn6022            | AMDE000000000               | SRR387244                | 3         |
| AB058 <sup>h</sup>    | USA                   | 2003              | Blood             | ST20                   | ST449                 | KL1 <sup>i</sup> | OCL1 <sup>j</sup> | II                              | 10                | ADHA000000000               | -                        | 1         |
| AB056 <sup>k</sup>    | USA                   | 2004              | Blood             | ST1                    | ST207                 | KL4 <sup>l</sup> | OCL3 <sup>m</sup> | III                             | 9                 | ADGZ000000000               | -                        | 1         |
| AB059 <sup>n</sup>    | USA                   | 2004              | Blood             | ST1                    | ST207                 | KL4 <sup>l</sup> | OCL3 <sup>m</sup> | III                             | 3                 | ADHB000000000               | -                        | 1         |
| Naval-21              | USA                   | 2006              | Wound             | ST19                   | ST946                 | KL15             | OCL1              | II                              | Tn6022            | AMSY000000000               | SRR387323                | 3         |
| Naval-83              | USA                   | 2006              | Wound             | ST20                   | ST449                 | KL1c             | OCL1              | II                              | 10                | AMFK000000000               | SRR387319                | 3         |
| 6013113               | UK                    | 2007              | Skin              | ST81                   | ST372                 | KL12             | OCL2 <sup>o</sup> | III                             | No AbaR           | ACYR000000000               | SRR089343                | -         |
| 6013150               | UK                    | 2007              | Skin              | ST81                   | ST498                 | KL12             | OCL2              | III                             | No AbaR           | ACYQ000000000               | SRR089344                | -         |
| 908-13                | USA                   | 2007              | Urine             | ST1                    | ST207                 | KL4              | OCL3              | III                             | Tn6019-6018       | AMHW000000000               | -                        | 5         |
| 909-02-7              | USA                   | 2007              | Sputum            | ST1                    | ST207                 | KL4 <sup>l</sup> | OCL3              | III                             | Tn6019-6018       | AMHZ000000000               | -                        | 5         |
| Canada-BC1            | Canada                | 2007              | nr                | ST1                    | ST947                 | KL15             | OCL3              | III                             | [29] <sup>p</sup> | AMSZ000000000               | SRR387315                | 3         |
| Canada-BC5            | Canada                | 2007              | nr                | ST1                    | ST947                 | KL15             | OCL3              | III                             | 29                | AFDN000000000               | SRR353953                | 3         |
| IS-58                 | nr                    | 2008              | Respiratory tract | ST1                    | ST945                 | KL25             | OCL2              | III                             | 10                | AMGH000000000               | SRR387296                | 3         |
| ANC 4097              | nr                    | 2011              | Tracheal aspirate | ST1                    | ST441                 | KL40             | OCL2              | III                             | 3                 | APRF000000000               | SRR654201                | -         |

<sup>a</sup> IP: Institut Pasteur scheme, O: Oxford scheme.

<sup>b</sup> The *carO* variants have been previously described in reference (4)

<sup>c</sup> not recorded.

<sup>d</sup> AB307-0294 is an antibiotic sensitive strain.

<sup>e</sup> also known as RUH875 (5).

<sup>f</sup> bracket indicates that NIPH 527 is likely to contain AbaR21.

<sup>g</sup> interrupted by ISAbal25

<sup>h</sup> AB058 is recorded as ceftazidime, cefepime, amikacin, tobramycin and ciprofloxacin resistant in reference (1).

<sup>i</sup> these loci are not in a single contig and may include IS.

<sup>j</sup> AB056 is recorded as ampicillin/sulbactam, ceftazidime, cefepime, imipenem, meropenem and ciprofloxacin resistant in reference (1)

<sup>k</sup> AB059 is recorded as ampicillin/sulbactam, ceftazidime, cefepime, imipenem, meropenem, amikacin and ciprofloxacin resistant in reference (1)

<sup>l</sup> likely to contain AbaR29.

## References

- Adams, M. D., E. R. Chan, N. D. Molyneaux, and R. A. Bonomo. 2010. Genome-wide analysis of divergence of antibiotic resistance determinants in closely related isolates of *Acinetobacter baumannii*. *Antimicrob Agents Chemother* 54:3569-3577. PMID: 20530228
- Adams, M. D., K. Goglin, N. Molyneaux, K. M. Hujer, H. Lavender, J. J. Jamison, I. J. MacDonald, K. M. Martin, T. Russo, A. A. Campagnari, A. M. Hujer, R. A. Bonomo, and S. R. Gill. 2008. Comparative genome sequence analysis of multidrug-resistant *Acinetobacter baumannii*. *J Bacteriol* 190:8053-8064. PMID: 18931120
- Chan AP, Sutton G, DePew J, Krishnakumar R, Choi Y, Huang XZ, Beck E, Harkins DM, Kim M, Lesho EP, Nikolich MP, Fouts DE. A novel method of consensus pan-chromosome assembly and large-scale comparative analysis reveal the highly flexible pan-genome of *Acinetobacter baumannii*. *Genome Biol* 2015 Jul 21;16:143. doi: 10.1186/s13059-015-0701-6. PMID: 26195261
- Mussi, M. A., A. S. Limansky, V. Relling, P. Ravasi, A. Arakaki, L. A. Actis, and A. M. Viale. 2011. Horizontal gene transfer and assortative recombination within the *Acinetobacter baumannii* clinical population provide genetic diversity at the single *carO* gene, encoding a major outer membrane protein channel. *J bacteriol* 193:4736-4748. PMID: 21764928
- Sahl, J.W., J. D. Gillette, J. M. Schupp, V. G. Waddell, E. M. Driebe, D. M. Engelthaler, P. Keim. 2013. Evolution of a pathogen: a comparative genomics analysis identifies a genetic pathway to pathogenesis in *Acinetobacter*. *PLoS One* 8:e54287. doi: 10.1371/journal.pone.0054287. PMID: 23365658
- Touchon, M., J. Cury, E. J. Yoon, L. Krizova, G. C. Cerqueira, C. Murphy, M. Feldgarden, J. Wortman, D. Clermont, T. Lambert, C. Grillot-Courvalin, A. Nemeec, P. Courvalin, and E. P. Rocha. 2014. The genomic diversification of the whole *Acinetobacter* genus: origins, mechanisms, and consequences. *Genome Biol Evol* 6:2866-2882. PMID: 25313016

**Table S3. Spatially clustered codons (separated by ≤5 codons) that harbour multiple independent substitution mutations within the GC1 population.** Key for note column: <-> indicates that both the indicated substitution and its reversion were detected in different parts of the GC1 tree; (xN) indicates that the indicated substitution mutation was detected multiple times, in N different branches of the GC1 tree. \* indicates codons affected by multiple independent mutations (details shown in Table 1). Genes related to antimicrobial resistance are highlighted in bold. (continued next page)

| Gene       | Product                                                                                       | Codon No. | Codon Change | Amino Acid Change | Type | A1 coordinate | Note  |
|------------|-----------------------------------------------------------------------------------------------|-----------|--------------|-------------------|------|---------------|-------|
| ABA1_00068 | Putative aliphatic sulfonates-binding protein precursor                                       | 212*      | ACA->ACG     | T->T              | s    | 68789         | (<->) |
| ABA1_00088 | Wzc, involved in capsule export                                                               | 545       | GGT->TGT     | G->C              | ns   | 88705         |       |
|            |                                                                                               | 547       | TCG->ACG     | S->T              | ns   | 88699         |       |
| ABA1_00091 | UDP-N-acetyl-galactosamine dehydrogenase Gna                                                  | 30        | GTA->GTT     | V->V              | s    | 92338         |       |
|            |                                                                                               | 31        | GTC->GTT     | V->V              | s    | 92341         |       |
|            |                                                                                               | 32*       | GGA->GGC     | G->G              | s    | 92344         |       |
|            |                                                                                               | 32        | GGT->GGC     | G->G              | s    | 92344         |       |
|            |                                                                                               | 35        | ATC->ATT     | I->I              | s    | 92353         |       |
| ABA1_00155 | BolA family transcriptional regulator                                                         | 91*       | TCA->CCA     | S->P              | ns   | 171998        | (<->) |
| ABA1_00215 | hypothetical protein                                                                          | 39        | GAC->GAG     | D->E              | ns   | 226421        |       |
|            |                                                                                               | 41        | CTC->TTC     | L->F              | ns   | 226425        |       |
| ABA1_00226 | <b>ParC DNA topoisomerase IV, A subunit</b>                                                   | 84*       | TCG->TTG     | S->L              | ns   | 239386        | (x5)  |
|            |                                                                                               | 84        | TTG->TGG     | L->W              | ns   | 239386        |       |
|            |                                                                                               | 88        | GAA->AAA     | E->K              | ns   | 239397        |       |
| ABA1_00294 | Sulphate permease, Sup                                                                        | 35        | TCT->TCA     | S->S              | s    | 302471        |       |
|            |                                                                                               | 40        | GTT->GTA     | V->V              | s    | 302456        |       |
| ABA1_00716 | hypothetical protein                                                                          | 377*      | GGA->AGA     | G->R              | ns   | 757604        | (x2)  |
| ABA1_00943 | Protein MosA                                                                                  | 298       | GCA->GAA     | A->E              | ns   | 994836        |       |
|            |                                                                                               | 302       | GCC->GCT     | A->A              | s    | 994823        |       |
| ABA1_01174 | hypothetical protein                                                                          | 34        | GTT->GCT     | V->A              | ns   | 1227313       |       |
|            |                                                                                               | 36        | GAA->GTA     | E->V              | ns   | 1227319       |       |
| ABA1_01266 | AhpF alkyl hydroperoxide reductase, F subunit                                                 | 433*      | GCG->ACG     | A->T              | ns   | 1332044       |       |
|            |                                                                                               | 433       | GCG->GCA     | A->A              | s    | 1332042       |       |
| ABA1_01701 | Cupin superfamily protein                                                                     | 163       | GTA->GCA     | V->A              | ns   | 1781284       |       |
|            |                                                                                               | 166       | CAA->AAA     | Q->K              | ns   | 1781276       |       |
| ABA1_01702 | Septum formation protein Maf                                                                  | 179       | GGT->GGG     | G->G              | s    | 1781859       |       |
|            |                                                                                               | 181       | CCC->TCC     | P->S              | ns   | 1781855       |       |
| ABA1_01794 | PepSY-associated TM helix family protein                                                      | 138       | TTC->ATC     | F->I              | ns   | 1878415       |       |
|            |                                                                                               | 141       | TTA->TCA     | L->S              | ns   | 1878425       |       |
| ABA1_01811 | hypothetical protein                                                                          | 93        | CCT->CCA     | P->P              | s    | 1897193       |       |
|            |                                                                                               | 94        | GAA->GGA     | E->G              | ns   | 1897191       |       |
| ABA1_01827 | Ribonuclease D (RNase D)                                                                      | 152       | AAT->AAA     | N->K              | ns   | 1908931       |       |
|            |                                                                                               | 154       | GTT->ATT     | V->I              | ns   | 1908935       |       |
| ABA1_01844 | Dihydrolipoyllysine-residue acetyltransferase component of pyruvate dehydrogenase complex(E2) | 296       | GCG->GTG     | A->V              | ns   | 1925851       |       |
|            |                                                                                               | 298       | GCT->GCC     | A->A              | s    | 1925858       |       |
| ABA1_01920 | F17 fimbrial protein precursor                                                                | 133       | CAA->CGA     | Q->R              | ns   | 2009574       |       |
|            |                                                                                               | 137       | CAA->AAA     | Q->K              | ns   | 2009563       |       |
| ABA1_01929 | <b>AcrB protein</b>                                                                           | 87        | GGT->AGT     | G->S              | ns   | 2023580       |       |
|            |                                                                                               | 90        | GAG->GTG     | E->V              | ns   | 2023570       |       |
|            |                                                                                               | 97*       | CCG->CTG     | P->L              | ns   | 2023549       | (x2)  |
| ABA1_01931 | <b>Two-component response regulator AdeR</b>                                                  | 24        | ATT->ACT     | I->T              | ns   | 2025241       |       |
|            |                                                                                               | 26*       | GAC->AAC     | D->N              | ns   | 2025246       |       |
|            |                                                                                               | 26        | GAC->GTC     | D->V              | ns   | 2025247       |       |
| ABA1_01932 | <b>Two-component response regulator AdeS</b>                                                  | 51        | GAA->AAA     | E->K              | ns   | 2026096       |       |
|            |                                                                                               | 55        | AGT->AAT     | S->N              | ns   | 2026109       |       |
|            |                                                                                               | 94        | GTC->GCC     | V->A              | ns   | 2026226       |       |
|            |                                                                                               | 97        | GCA->ACA     | A->T              | ns   | 2026234       |       |
| ABA1_01953 | <b>MFS transporter, drug:H+ antiporter-1</b>                                                  | 25*       | TTT->ATT     | F->I              | ns   | 2050142       |       |
|            |                                                                                               | 25        | TTT->CTT     | F->L              | ns   | 2050142       |       |
|            |                                                                                               | 327       | CCG->TCG     | P->S              | ns   | 2049236       |       |
|            |                                                                                               | 328       | TTC->TCC     | F->S              | ns   | 2049232       |       |
| ABA1_02065 | PcaH protocatechuate 3,4-dioxygenase, beta subunit                                            | 144*      | AAA->ACA     | K->T              | ns   | 2166536       | (x2)  |
| ABA1_02134 | Diguanylate cyclase (GGDEF) domain protein                                                    | 579       | CTA->CTG     | L->L              | s    | 2237948       |       |
|            |                                                                                               | 580       | AAA->ACA     | K->T              | ns   | 2237950       |       |
| ABA1_02141 | Proline-specific permease proY                                                                | 233*      | CCG->CCA     | P->P              | s    | 2246974       | (x2)  |
| ABA1_02240 | FhuE receptor precursor                                                                       | 263       | GAT->GTT     | D->V              | ns   | 2350844       |       |
|            |                                                                                               | 267       | GGA->GGG     | G->G              | s    | 2350831       |       |
| ABA1_02258 | Protein U precursor                                                                           | 181       | TGT->TAT     | C->Y              | ns   | 2366783       |       |
|            |                                                                                               | 183       | GAT->GTT     | D->V              | ns   | 2366777       |       |
| ABA1_02377 | Cyclopropane-fatty-acyl-phospholipid synthase family protein                                  | 62        | AAT->AAA     | N->K              | ns   | 2501896       |       |
|            |                                                                                               | 65        | TTG->TAG     | L->*              | ns   | 2501888       |       |
| ABA1_02431 | Serine/threonine-protein kinase 1                                                             | 55*       | TTT->TAT     | F->Y              | ns   | 2550200       | (x2)  |
| ABA1_02631 | <b>Beta-lactamase class C, ampC</b>                                                           | 341*      | AAC->ACC     | N->T              | ns   | 2734409       | (x2)  |



**Table S3. Spatially clustered codons (separated by  $\leq 5$  codons) that harbour multiple independent substitution mutations within the GC1 population. (continued from prev page)**

| Gene       | Product                                     | Codon No. | Codon Change | Amino Acid Change | Type | A1 coordinate | Note  |
|------------|---------------------------------------------|-----------|--------------|-------------------|------|---------------|-------|
| ABA1_02648 | Ferric anguibactin receptor precursor (OM2) | 392*      | GCT->ACT     | A->T              | ns   | 2756443       | (x3)  |
|            |                                             | 392       | GCT->GAT     | A->D              | ns   | 2756442       |       |
|            |                                             | 392       | GCT->GTT     | A->V              | ns   | 2756442       |       |
| ABA1_02860 | <b>DNA gyrase, A subunit GyrA</b>           | 81*       | TCA->TTA     | S->L              | ns   | 2992514       | (X4)  |
| ABA1_02933 | hypothetical protein                        | 391       | ACA->AGA     | T->R              | ns   | 3078412       |       |
|            |                                             | 395       | ATG->ATT     | M->I              | ns   | 3078399       |       |
| ABA1_03474 | <b>Penicillin binding protein</b>           | 512       | GCA->TCA     | A->S              | ns   | 3625121       |       |
|            |                                             | 515       | GCC->GTC     | A->V              | ns   | 3625111       |       |
| ABA1_03676 | Proline-specific permease proY              | 331*      | AGT->GGT     | S->G              | ns   | 3840150       | (<->) |
| ABA1_03708 | DNA-3-methyladenine glycosylase 1           | 24*       | GGC->GGT     | G->G              | s    | 3871606       | (<->) |

**Table S4. Results of BEAST analyses.** Results are shown for combinations of two clock models (strict or relaxed clock), including or excluding the 454 sequenced genome 307-0294. As explained in the text, the final results reported in the text and shown in Figure 3 and Figure S2 are those using a strict clock without 307-0294 (part A).  
(continued on next page)

**(A) Strict Clock, without 454 - RESULTS REPORTED IN TEXT**

| Summary Statistic           | likelihood                 | treeModel.rootHeight | tMRCA(Lineage 1)   | tMRCA(Lineage 2)   | clock.rate             |
|-----------------------------|----------------------------|----------------------|--------------------|--------------------|------------------------|
| mean                        | -12239.7598                | 51.2726              | 33.6429            | 43.6976            | 2.46E-03               |
| stderr of mean              | 0.0438                     | 0.0483               | 0.0229             | 0.0423             | 2.68E-06               |
| stdev                       | 5.6221                     | 2.6757               | 0.9316             | 3.072              | 1.29E-04               |
| variance                    | 31.6082                    | 7.1594               | 0.8678             | 9.4375             | 1.65E-08               |
| median                      | -12239.4198                | 51.1631              | 33.5813            | 43.5688            | 2.46E-03               |
| mode                        | n/a                        | n/a                  | n/a                | n/a                | n/a                    |
| geometric mean              | n/a                        | 51.2032              | 33.63              | 43.5903            | 2.46E-03               |
| 95% HPD Interval            | [-12250.9303, -12229.1215] | [46.0987, 56.5585]   | [31.8712, 35.4911] | [37.8147, 49.7679] | [2.2132E-3, 2.7178E-3] |
| auto-correlation time (ACT) | 3941.4258                  | 21084.1637           | 43.5989            | 13.6679            | 28142.2278             |
| effective sample size (ESS) | 16442.7807                 | 3073.7762            | 1651.6016          | 5268.4152          | 2302.8738              |

**(B) Strict Clock, with 454**

| Summary Statistic           | likelihood                 | treeModel.rootHeight | tMRCA(Lineage 1)   | tMRCA(Lineage 2)   | clock.rate             |
|-----------------------------|----------------------------|----------------------|--------------------|--------------------|------------------------|
| mean                        | -12715.3818                | 48.6972              | 32.9567            | 44.0586            | 2.36E-03               |
| stderr of mean              | 0.0371                     | 0.0408               | 0.0193             | 0.0406             | 2.30E-06               |
| stdev                       | 5.4645                     | 2.3956               | 0.8154             | 3.1071             | 1.18E-04               |
| variance                    | 29.8611                    | 5.7388               | 0.6648             | 9.6543             | 1.38E-08               |
| median                      | -12715.0149                | 48.5785              | 32.8896            | 43.8966            | 2.36E-03               |
| mode                        | n/a                        | n/a                  | n/a                | n/a                | n/a                    |
| geometric mean              | n/a                        | 48.6386              | 32.9467            | 43.95              | 2.36E-03               |
| 95% HPD Interval            | [-12726.4007, -12705.2781] | [44.0675, 53.4197]   | [31.4415, 34.5816] | [38.0465, 50.2409] | [2.1328E-3, 2.5944E-3] |
| auto-correlation time (ACT) | 2987.4109                  | 18795.7594           | 40.1689            | 12.314             | 24781.6867             |
| effective sample size (ESS) | 21693.7011                 | 3448.0118            | 1792.6322          | 5847.6379          | 2615.1569              |

**(C) Relaxed Clock, without 454**

| Summary Statistic           | likelihood                | treeModel.rootHeight | tMRCA(Lineage 1)  | tMRCA(Lineage 2) | meanRate               | uclid.mean             | uclid.stdev      | coefficientOf Variation |
|-----------------------------|---------------------------|----------------------|-------------------|------------------|------------------------|------------------------|------------------|-------------------------|
| mean                        | -12186.5041               | 61.0668              | 35.2964           | 50.9753          | 2.43E-03               | 2.50E-03               | 0.605            | 0.6036                  |
| stderr of mean              | 0.037                     | 0.3335               | 0.063             | 0.47             | 9.81E-06               | 8.45E-06               | 1.98E-03         | 2.11E-03                |
| stdev                       | 7.5127                    | 16.9635              | 3.66              | 21.1756          | 3.92E-04               | 4.38E-04               | 0.1436           | 0.1458                  |
| variance                    | 56.4399                   | 287.7591             | 13.3954           | 448.4081         | 1.53E-07               | 1.92E-07               | 0.0206           | 0.0213                  |
| median                      | -12186.1492               | 58.5673              | 34.5701           | 49.2148          | 2.40E-03               | 2.45E-03               | 0.5897           | 0.5847                  |
| mode                        | n/a                       | n/a                  | n/a               | n/a              | n/a                    | n/a                    | n/a              | n/a                     |
| geometric mean              | n/a                       | 58.9477              | 35.1389           | 46.6064          | 2.40E-03               | 2.47E-03               | 0.5885           | 0.587                   |
| 95% HPD Interval            | [-12201.2842, -12172.085] | [31.1084, 92.2934]   | [30.534, 41.2165] | [14.91, 89.2336] | [1.6922E-3, 3.2388E-3] | [1.7351E-3, 3.3844E-3] | [0.3451, 0.8918] | [0.3524, 0.9]           |
| auto-correlation time (ACT) | 17956.5582                | 2.87E+05             | 24.4177           | 40.5861          | 4.65E+05               | 2.77E+05               | 1.40E+05         | 1.56E+05                |
| effective sample size (ESS) | 41300.7878                | 2586.445             | 3374.6811         | 2030.3026        | 1593.6184              | 2680.5509              | 5279.9546        | 4765.5798               |

**(D) Relaxed Clock, with 454**

| Summary Statistic           | likelihood                 | treeModel.rootHeight | tMRCA(Lineage 1)   | tMRCA(Lineage 2)   | meanRate               | uclid.mean             | uclid.stdev      | coefficientOf Variation |
|-----------------------------|----------------------------|----------------------|--------------------|--------------------|------------------------|------------------------|------------------|-------------------------|
| mean                        | -12645.3175                | 54.0386              | 34.4145            | 41.761             | 2.53E-03               | 2.63E-03               | 0.6572           | 0.6557                  |
| stderr of mean              | 0.0377                     | 0.4015               | 0.0742             | 0.6089             | 1.35E-05               | 1.20E-05               | 2.52E-03         | 2.75E-03                |
| stdev                       | 7.2723                     | 16.0747              | 3.872              | 21.9491            | 4.56E-04               | 5.24E-04               | 0.1476           | 0.1542                  |
| variance                    | 52.8856                    | 258.3945             | 14.9926            | 481.7636           | 2.08E-07               | 2.75E-07               | 0.0218           | 0.0238                  |
| median                      | -12644.9705                | 51.0943              | 33.5729            | 36.1207            | 2.47E-03               | 2.54E-03               | 0.6415           | 0.6343                  |
| mode                        | n/a                        | n/a                  | n/a                | n/a                | n/a                    | n/a                    | n/a              | n/a                     |
| geometric mean              | n/a                        | 51.9672              | 34.2434            | 36.6312            | 2.49E-03               | 2.58E-03               | 0.6411           | 0.6388                  |
| 95% HPD Interval            | [-12659.9532, -12631.5859] | [30.226, 83.8079]    | [30.0161, 40.2496] | [13.0875, 83.0738] | [1.7173E-3, 3.4931E-3] | [1.7667E-3, 3.7056E-3] | [0.3889, 0.9533] | [0.3837, 0.958]         |
| auto-correlation time (ACT) | 20074.726                  | 4.67E+05             | 30.5822            | 64.0388            | 6.56E+05               | 3.93E+05               | 2.18E+05         | 2.39E+05                |
| effective sample size (ESS) | 37301.6299                 | 1602.578             | 2720.6024          | 1299.2436          | 1142.1205              | 1905.6774              | 3433.4163        | 3133.8716               |

**(E) Summary**

| Clock model                | tMRCA(GC1)         | tMRCA(Lineage 1)   | tMRCA(Lineage 2)   | rate                   |
|----------------------------|--------------------|--------------------|--------------------|------------------------|
| *Strict Clock, without 454 | [46.0987, 56.5585] | [31.8712, 35.4911] | [37.8147, 49.7679] | [2.2132E-3, 2.7178E-3] |
| Strict Clock, with 454     | [44.0675, 53.4197] | [31.4415, 34.5816] | [38.0465, 50.2409] | [2.1328E-3, 2.5944E-3] |
| Relaxed Clock, without 454 | [31.1084, 92.2934] | [30.534, 41.2165]  | [14.91, 89.2336]   | [1.6922E-3, 3.2388E-3] |
| Relaxed Clock, with 454    | [30.226, 83.8079]  | [30.0161, 40.2496] | [13.0875, 83.0738] | [1.7173E-3, 3.4931E-3] |

**Table S5. GenBank accession numbers for K gene clusters.**

| <b>Name</b> | <b>GenBank accession number<sup>a</sup></b> | <b>Base Coordinates</b> |
|-------------|---------------------------------------------|-------------------------|
| KL1         | CP010781                                    | 87963-110544            |
| KL1a        | KF483599.2                                  | 724-24299               |
| KL1b        | GQ406245.5                                  | 724-25628               |
| KL2         | KJ459911.2                                  | 3057-27820              |
| KL3         | KF793926.1                                  | 1-27785                 |
| KL4         | JN409449.3                                  | 1-33327                 |
| KL5         | NC_010400 <sup>b</sup>                      | 58381 - 88436           |
| KL6         | KF130871.1                                  | 1-28301                 |
| KL7         | NC_017387 <sup>b</sup>                      | 77073 - 107448          |
| KL8         | CP003847 <sup>b</sup>                       | 90803 - 127124          |
| KL9         | JN247441.4                                  | 1-30189                 |
| KL10        | CP003856.1 <sup>b</sup>                     | 304605-332863           |
| KL12        | JN107991.2                                  | 3247-38792              |
| KL13        | AEPK01000012.1 <sup>b</sup>                 | 32538-70756             |
| KL14        | KF030679.2                                  | 724-21932               |
| KL15        | KC118540.6                                  | 9179-37114              |
| KL17        | KC118541.2                                  | 3247-25474              |
| KL20        | JQ684178.2                                  | 3250-32301              |
| KL23        | AFDL01000004.1 <sup>b</sup>                 | 695766-722540           |
| KL25        | BK008886                                    | 1-23498                 |
| KL27        | KT266827.1                                  | 1-32668                 |
| KL28        | AMTB01000027 <sup>b</sup>                   | 32705 - 60750           |
| KL30        | APPL01000041.1 <sup>b</sup>                 | 82987- 106722           |
| KL32        | KT359615.1                                  | 1-24182                 |
| KL33        | APRA01000009.1 <sup>b</sup>                 | 555847-581577           |
| KL37        | APOU01000009.1 <sup>b</sup>                 | 32574-53092             |
| KL40        | KP100029.1                                  | 724-24731               |
| KL42        | APOF01000020.1 <sup>b</sup>                 | 103755-129611           |
| KL44a       | APRC01000043 <sup>b</sup>                   | 97989 - 131451          |
| KL45        | APQV01000013.1 <sup>b</sup>                 | 342271-366295           |
| KL46        | APQY01000009.1 <sup>b</sup>                 | 583068-609640           |
|             | APOV01000005.1 <sup>b</sup>                 | 12859-36514             |
| KL49        | KT359616.1                                  | 1-34551                 |
| KL58        | KT359617.1                                  | 1-27015                 |
| KL63        | KC526909 <sup>b,c</sup>                     | 1-30479                 |
| KL78        | AVOE01000009.1 <sup>b</sup>                 | 32365-69506             |
| KL79        | JEYA01000007.1 <sup>b</sup>                 | 112492-145289           |
| KL91        | KM402814.1                                  | 169-26579               |

<sup>a</sup> Accession number of contig that includes the capsule gene cluster.

<sup>b</sup> Annotated differently to scheme reported in Kenyon and Hall, 2013

<sup>c</sup> Sequence including *fkpA-wzc-wzb-wza* is missing from GenBank entry
